# Supplementary material
Source: PubMed Central journal article supplement (PMC10357364)
Supplement: jamapsychiatry-e232295-s001.pdf [file jamapsychiatry-e232295-s001.pdf]

## Supplementary Online Content

Forrest LN, Beccia AL, Exten C, Gehman S, Ansell EB. Intersectional prevalence of suicide ideation, plan, and attempt based on gender, sexual orientation, race and ethnicity, and rurality. *JAMA Psychiatry*. Published online July 19, 2023. doi:10.1001/jamapsychiatry.2023.2295

**eAppendix 1.** Calculation of Model Parameters

**eAppendix 2.** Description of NSDUH 2020 Methodological Changes and Their Consequences for Analyses

**eTable 1.** Size of Each Social Strata and Observed Prevalence of Suicide Ideation, Plan, and Attempt, Excluding 2020 Data

**eTable 2.** Size of the Social Strata That Were Excluded From Analyses due to Small Sample Sizes, Excluding 2020 Data

**eTable 3.** Size of Each Social Strata and Observed Prevalence of Suicide Ideation, Plan, and Attempt, Including 2020 Data

**eTable 4.** Predicted Prevalence of Suicide Ideation, Suicide Plan, and Suicide Attempt, Including 2020 Data

**eAppendix 3.** Code Used for Analyses

**eReferences**

This supplementary material has been provided by the authors to give readers additional information about their work.

## **eAppendix 1. Calculation of model parameters**

The variance partition coefficient (VPC) is calculated by dividing the strata-level variance by the strata-level variance + 3.29. 3.29 is a non-estimated parameter and is equal to the variance of the standard logistic distribution (Beccia et al., 2021). This value is then multiplied by 100, to put it on a percentage scale. See Beccia et al. (2021) Supplemental Material for a detailed description of these parameter calculations.

## **eAppendix 2. Description of NSDUH 2020 methodological changes and their consequences for analyses**

NSDUH 2020 data included two methodological changes compared to prior years: different skip rules for assessing suicide plans and suicide attempts and different interview administration procedures. NSDUH states that because of these methodological changes, 2020 data should not be combined with prior years' data. However, MAIHDA's model estimation is enhanced with larger sample sizes, so we performed supplemental analyses that included NSDUH 2020 data in addition to NSUDH 2015–2019 data. As we describe below, we believe that the two methodological changes NSDUH implemented would have little impact on the models we estimated and interpreted.

Regarding skip rules, in NSDUH 2020 Quarter 1 and all quarters of all prior years, participants were asked about suicide plans and attempts only if they reported suicide ideation. However, in NSDUH 2020 Quarter 4, all participants were asked about suicide plans and attempts, regardless of whether they reported suicide ideation (see pp. 110–111 of the NSDUH 2020 methodology report). However, p. 111 of the NSDUH 2020 methodology report further states that fewer than 15 people reported plans or attempts in the absence of ideation. Given this very small number, those people who in NSDUH 2020 Quarter 4 reported suicide plans or attempts in the absence of suicide ideation were treated “as not making suicide plans or attempting suicide in that period.” In other words, although the administration of the questions about suicide plans and attempts differed in NSDUH 2020 Quarter 4, the actual data were coded in the exact same way as they were in all prior years. Thus, we do not believe the skip rules that were not applied in the NSDUH 2020 Quarter 4 methodology (but that were applied in the data) prevent us from interpreting the 2020 data along with the prior years' data.

Per the NSDUH 2020 methodology report (p. 1), NSDSUH 2020 Quarter 1 and data from all prior years were collected via face-to-face interviews. NSDUH 2020 Quarter 4 data were collected via web-based interviewing. This means that data were collected using face-to-face interviews for 21 of the 22 quarters represented in the combined 2015–2020 NSDUH data. (NSDUH 2020 data were only collected during Quarter 1 and Quarter 4 due to the Covid-19 pandemic). Although it is conservative to not compare any 2020 data to those of prior years (which is why we present only the 2015–2019 data in the main text), it seems unlikely that the change from face-to-face interviews to web-based interviews would drastically impact suicide-related outcomes, given that there is consistency between self-report and clinician-administered suicide-related outcomes (e.g., Fox et al., 2020).

We describe in **Supplemental Table 3** the observed prevalence for suicide ideation, plan, and attempt for the 2015–2020 combined data, and the predicted prevalence for all outcomes for the 2015–2020 combined data in **Supplemental Table 4**. The pattern of results presented here is highly similar to the results presented in the main text, though some 95% credible intervals are slightly more narrow, likely on account of larger sample sizes.

**eTable 1.** Size of each social strata and observed prevalence of suicide ideation, plan, and attempt excluding 2020 data

| Gender   | Sexual orientation | Rurality            | Race and ethnicity  | Social stratum <i>n</i> | Suicide ideation <i>n</i> (%) | Suicide plan <i>n</i> (%) | Suicide attempt <i>n</i> (%) |
|----------|--------------------|---------------------|---------------------|-------------------------|-------------------------------|---------------------------|------------------------------|
| Men      | Heterosexual       | Metro (large)       | Black, Non-Hispanic | 6636                    | 275 (4.2)                     | 83 (1.3)                  | 49 (0.7)                     |
|          |                    |                     | Hispanic            | 9286                    | 371 (4)                       | 101 (1.1)                 | 64 (0.7)                     |
|          |                    |                     | White, Non-Hispanic | 21161                   | 1093 (5.2)                    | 270 (1.3)                 | 103 (0.5)                    |
|          |                    | Metro (small)       | Black, Non-Hispanic | 3222                    | 136 (4.3)                     | 51 (1.6)                  | 34 (1.1)                     |
|          |                    |                     | Hispanic            | 4980                    | 239 (4.8)                     | 72 (1.5)                  | 37 (0.7)                     |
|          |                    |                     | White, Non-Hispanic | 21798                   | 1166 (5.4)                    | 340 (1.6)                 | 143 (0.7)                    |
|          |                    | Nonmetro            | Black, Non-Hispanic | 1268                    | 50 (4)                        | 15 (1.2)                  | 10 (0.8)                     |
|          |                    |                     | Hispanic            | 1454                    | 59 (4.1)                      | 17 (1.2)                  | 13 (0.9)                     |
|          |                    |                     | White, Non-Hispanic | 14342                   | 746 (5.2)                     | 234 (1.6)                 | 96 (0.7)                     |
|          | Gay/Lesbian        | Metro (large)       | Black, Non-Hispanic | 200                     | 20 (10.1)                     | <10                       | <10                          |
|          |                    |                     | Hispanic            | 307                     | 39 (12.7)                     | 12 (3.9)                  | <10                          |
|          |                    |                     | White, Non-Hispanic | 718                     | 87 (12.2)                     | 34 (4.8)                  | 14 (2)                       |
|          |                    | Metro (small)       | Black, Non-Hispanic | 65                      | <10                           | <10                       | <10                          |
|          |                    |                     | Hispanic            | 124                     | 20 (16.1)                     | 10 (8.1)                  | <10                          |
|          |                    |                     | White, Non-Hispanic | 431                     | 64 (14.9)                     | 17 (4)                    | <10                          |
|          |                    | Nonmetro            | Black, Non-Hispanic | 24                      | <10                           | <10                       | <10                          |
|          |                    |                     | Hispanic            | 32                      | 6 (18.8)                      | <10                       | <10                          |
|          |                    |                     | White, Non-Hispanic | 202                     | 27 (13.4)                     | 10 (5)                    | 11 (5.5)                     |
| Bisexual | Metro (large)      | Black, Non-Hispanic | 148                 | 28 (18.9)               | 12 (8.1)                      | <10                       |                              |
|          |                    | Hispanic            | 257                 | 54 (21.2)               | 22 (8.6)                      | <10                       |                              |
|          |                    | White, Non-Hispanic | 566                 | 111 (19.7)              | 42 (7.5)                      | 15 (2.7)                  |                              |
|          | Metro (small)      | Black, Non-Hispanic | 63                  | <10                     | 4 (6.3)                       | <10                       |                              |
|          |                    | Hispanic            | 131                 | 33 (25.4)               | 11 (8.5)                      | <10                       |                              |
|          |                    | White, Non-Hispanic | 546                 | 129 (23.6)              | 47 (8.6)                      | 17 (3.1)                  |                              |
|          | Nonmetro           | Black, Non-Hispanic | 15                  | <10                     | <10                           | <10                       |                              |
|          |                    | Hispanic            | 32                  | <10                     | <10                           | <10                       |                              |
|          |                    | White, Non-Hispanic | 290                 | 56 (19.4)               | 22 (7.6)                      | <10                       |                              |
| Women    | Heterosexual       | Metro (large)       | Black, Non-Hispanic | 7920                    | 335 (4.2)                     | 99 (1.3)                  | 58 (0.7)                     |
|          |                    |                     | Hispanic            | 10504                   | 454 (4.3)                     | 127 (1.2)                 | 72 (0.7)                     |
|          |                    |                     | White, Non-Hispanic | 22643                   | 1197 (5.3)                    | 313 (1.4)                 | 133 (0.6)                    |
|          |                    | Metro (small)       | Black, Non-Hispanic | 3842                    | 196 (5.1)                     | 51 (1.3)                  | 36 (0.9)                     |
|          |                    |                     | Hispanic            | 5422                    | 279 (5.2)                     | 90 (1.7)                  | 49 (0.9)                     |
|          |                    |                     | White, Non-Hispanic | 23425                   | 1322 (5.7)                    | 376 (1.6)                 | 173 (0.7)                    |
|          |                    | Nonmetro            | Black, Non-Hispanic | 1563                    | 64 (4.1)                      | 20 (1.3)                  | 14 (0.9)                     |
|          |                    |                     | Hispanic            | 1522                    | 86 (5.7)                      | 24 (1.6)                  | 13 (0.9)                     |
|          |                    |                     | White, Non-Hispanic | 15507                   | 887 (5.7)                     | 282 (1.8)                 | 101 (0.7)                    |
|          | Gay/Lesbian        | Metro (large)       | Black, Non-Hispanic | 269                     | 26 (9.7)                      | <10                       | <10                          |
|          |                    |                     | Hispanic            | 256                     | 39 (15.4)                     | 14 (5.5)                  | <10                          |
|          |                    |                     | White, Non-Hispanic | 507                     | 75 (14.9)                     | 27 (5.4)                  | 12 (2.4)                     |
|          |                    | Metro (small)       | Black, Non-Hispanic | 108                     | <10                           | <10                       | <10                          |
|          |                    |                     | Hispanic            | 120                     | 22 (18.5)                     | 10 (8.4)                  | 8 (6.7)                      |
|          |                    |                     | White, Non-Hispanic | 504                     | 80 (15.9)                     | 35 (7)                    | 13 (2.6)                     |
|          |                    | Nonmetro            | Black, Non-Hispanic | 27                      | <10                           | <10                       | <10                          |
|          |                    |                     | Hispanic            | 31                      | <10                           | <10                       | <10                          |
|          |                    |                     | White, Non-Hispanic | 240                     | 52 (21.7)                     | 21 (8.8)                  | 10 (4.2)                     |
| Bisexual | Metro (large)      | Black, Non-Hispanic | 720                 | 130 (18.3)              | 59 (8.3)                      | 36 (5.1)                  |                              |
|          |                    | Hispanic            | 730                 | 150 (20.6)              | 55 (7.6)                      | 26 (3.6)                  |                              |
|          |                    | White, Non-Hispanic | 1746                | 385 (22.2)              | 152 (8.8)                     | 72 (4.2)                  |                              |
|          | Metro (small)      | Black, Non-Hispanic | 304                 | 57 (18.9)               | 23 (7.6)                      | <10                       |                              |
|          |                    | Hispanic            | 443                 | 101 (22.9)              | 45 (10.2)                     | 23 (5.2)                  |                              |
|          |                    | White, Non-Hispanic | 1872                | 463 (24.9)              | 184 (9.9)                     | 84 (4.5)                  |                              |
|          | Nonmetro           | Black, Non-Hispanic | 83                  | 19 (22.9)               | 13 (15.7)                     | <10                       |                              |
|          |                    | Hispanic            | 136                 | 40 (29.6)               | 17 (12.6)                     | 10 (7.4)                  |                              |
|          |                    | White, Non-Hispanic | 1058                | 261 (24.9)              | 105 (10)                      | 52 (5)                    |                              |

*Note.* Metro = metropolitan, 95% CI = 95% credible interval. This table shows all of the social strata, stratum-specific sample sizes, and stratum-specific observed prevalence for all outcomes. The table can be interpreted from left to right, hierarchically. For example, the cell including “Men” has three nested cells for the three sexual orientations included in the study. Each sexual orientation has three nested cells for the levels of rurality. Each level of rurality includes three nested cells for race and ethnicity. To maintain de-identifiability, we do not report the *n* or % for cells that included fewer than 10 people reporting suicide ideation, plans, or attempts.

**eTable 2.** Size of the social strata that were excluded from analyses due to small sample sizes, and numbers of people with suicide ideation, plan, and attempt, excluding 2020 data

| Gender   | Sexual orientation | County                        | Race and ethnicity            | Social stratum <i>n</i> | Ideation <i>n</i> | Plan <i>n</i> | Attempt <i>n</i> |
|----------|--------------------|-------------------------------|-------------------------------|-------------------------|-------------------|---------------|------------------|
| Men      | Heterosexual       | Metro (large)                 | American Indian, Non-Hispanic | 224                     | 12                | <10           | <10              |
|          |                    |                               | Asian, Non-Hispanic           | 3007                    | 94                | 28            | 15               |
|          |                    |                               | Multiracial, Non-Hispanic     | 1169                    | 111               | 42            | 23               |
|          |                    |                               | Native Hawaiian, Non-Hispanic | 186                     | <10               | <10           | <10              |
|          |                    | Metro (small)                 | American Indian, Non-Hispanic | 402                     | 35                | <10           | <10              |
|          |                    |                               | Asian, Non-Hispanic           | 1288                    | 51                | 16            | <10              |
|          |                    |                               | Multiracial, Non-Hispanic     | 1261                    | 103               | 41            | 20               |
|          |                    |                               | Native Hawaiian, Non-Hispanic | 217                     | <10               | <10           | <10              |
|          |                    | Nonmetro                      | American Indian, Non-Hispanic | 711                     | 37                | 23            | 15               |
|          |                    |                               | Asian, Non-Hispanic           | 220                     | <10               | <10           | <10              |
|          |                    |                               | Multiracial, Non-Hispanic     | 606                     | 51                | 13            | <10              |
|          |                    |                               | Native Hawaiian, Non-Hispanic | 68                      | <10               | <10           | <10              |
|          | Gay/Lesbian        | Metro (large)                 | American Indian, Non-Hispanic | <10                     | <10               | <10           | <10              |
|          |                    |                               | Asian, Non-Hispanic           | 64                      | 11                | <10           | <10              |
|          |                    |                               | Multiracial, Non-Hispanic     | 45                      | <10               | <10           | <10              |
|          |                    |                               | Native Hawaiian, Non-Hispanic | 12                      | <10               | <10           | <10              |
|          |                    | Metro (small)                 | American Indian, Non-Hispanic | 14                      | <10               | <10           | <10              |
|          |                    |                               | Asian, Non-Hispanic           | 29                      | <10               | <10           | <10              |
|          |                    |                               | Multiracial, Non-Hispanic     | 35                      | <10               | <10           | <10              |
|          |                    |                               | Native Hawaiian, Non-Hispanic | <10                     | <10               | <10           | <10              |
| Nonmetro |                    | American Indian, Non-Hispanic | 13                            | <10                     | <10               | <10           |                  |
|          |                    | Asian, Non-Hispanic           | <10                           | <10                     | <10               | <10           |                  |
|          |                    | Multiracial, Non-Hispanic     | 13                            | <10                     | <10               | <10           |                  |
|          |                    | Native Hawaiian, Non-Hispanic | <10                           | <10                     | <10               | <10           |                  |
| Bisexual | Metro (large)      | American Indian, Non-Hispanic | <10                           | <10                     | <10               | <10           |                  |
|          |                    | Asian, Non-Hispanic           | 79                            | <10                     | <10               | <10           |                  |
|          |                    | Multiracial, Non-Hispanic     | 53                            | 14                      | <10               | <10           |                  |
|          |                    | Native Hawaiian, Non-Hispanic | <10                           | <10                     | <10               | <10           |                  |
|          | Metro (small)      | American Indian, Non-Hispanic | 17                            | <10                     | <10               | <10           |                  |
|          |                    | Asian, Non-Hispanic           | 35                            | <10                     | <10               | <10           |                  |
|          |                    | Multiracial, Non-Hispanic     | 40                            | 14                      | <10               | <10           |                  |
|          |                    | Native Hawaiian, Non-Hispanic | 11                            | <10                     | <10               | <10           |                  |
|          | Nonmetro           | American Indian, Non-Hispanic | 24                            | <10                     | <10               | <10           |                  |
|          |                    | Asian, Non-Hispanic           | <10                           | <10                     | <10               | <10           |                  |
|          |                    | Multiracial, Non-Hispanic     | 24                            | <10                     | <10               | <10           |                  |
|          |                    | Native Hawaiian, Non-Hispanic | <10                           | <10                     | <10               | <10           |                  |
| Women    | Heterosexual       | Metro (large)                 | American Indian, Non-Hispanic | 214                     | 19                | <10           | <10              |
|          |                    |                               | Asian, Non-Hispanic           | 3016                    | 121               | 29            | 21               |
|          |                    |                               | Multiracial, Non-Hispanic     | 1158                    | 96                | 35            | <10              |
|          |                    |                               | Native Hawaiian, Non-Hispanic | 167                     | 12                | <10           | <10              |
|          |                    | Metro (small)                 | American Indian, Non-Hispanic | 444                     | 33                | 12            | <10              |
|          |                    |                               | Asian, Non-Hispanic           | 1331                    | 50                | 16            | <10              |
|          |                    |                               | Multiracial, Non-Hispanic     | 1300                    | 111               | 34            | 16               |
|          |                    |                               | Native Hawaiian, Non-Hispanic | 233                     | <10               | <10           | <10              |
|          |                    | Nonmetro                      | American Indian, Non-Hispanic | 753                     | 53                | 23            | 13               |
|          |                    |                               | Asian, Non-Hispanic           | 266                     | <10               | <10           | <10              |
|          |                    |                               | Multiracial, Non-Hispanic     | 578                     | 50                | 18            | 10               |
|          |                    |                               | Native Hawaiian, Non-Hispanic | 71                      | <10               | <10           | <10              |
|          | Gay/Lesbian        | Metro (large)                 | American Indian, Non-Hispanic | <10                     | <10               | <10           | <10              |
|          |                    |                               | Asian, Non-Hispanic           | 30                      | <10               | <10           | <10              |
|          |                    |                               | Multiracial, Non-Hispanic     | 56                      | <10               | <10           | <10              |
|          |                    |                               | Native Hawaiian, Non-Hispanic | <10                     | <10               | <10           | <10              |
|          |                    | Metro (small)                 | American Indian, Non-Hispanic | 12                      | <10               | <10           | <10              |

| Gender | Sexual orientation | County        | Race and ethnicity            | Social stratum <i>n</i> | Ideation <i>n</i> | Plan <i>n</i> | Attempt <i>n</i> |
|--------|--------------------|---------------|-------------------------------|-------------------------|-------------------|---------------|------------------|
|        |                    |               | Asian, Non-Hispanic           | 22                      | <10               | <10           | <10              |
|        |                    |               | Multiracial, Non-Hispanic     | 49                      | 15                | <10           | <10              |
|        |                    |               | Native Hawaiian, Non-Hispanic | <10                     | <10               | <10           | <10              |
|        |                    | Nonmetro      | American Indian, Non-Hispanic | 15                      | <10               | <10           | <10              |
|        |                    |               | Asian, Non-Hispanic           | <10                     | <10               | <10           | <10              |
|        |                    |               | Multiracial, Non-Hispanic     | 25                      | <10               | <10           | <10              |
|        |                    |               | Native Hawaiian, Non-Hispanic | <10                     | <10               | <10           | <10              |
|        | Bisexual           | Metro (large) | American Indian, Non-Hispanic | 23                      | <10               | <10           | <10              |
|        |                    |               | Asian, Non-Hispanic           | 155                     | 25                | <10           | <10              |
|        |                    |               | Multiracial, Non-Hispanic     | 214                     | 67                | 25            | 20               |
|        |                    |               | Native Hawaiian, Non-Hispanic | <10                     | <10               | <10           | <10              |
|        |                    | Metro (small) | American Indian, Non-Hispanic | 57                      | 16                | <10           | <10              |
|        |                    |               | Asian, Non-Hispanic           | 74                      | 22                | <10           | <10              |
|        |                    |               | Multiracial, Non-Hispanic     | 217                     | 66                | 34            | 16               |
|        |                    |               | Native Hawaiian, Non-Hispanic | 18                      | <10               | <10           | <10              |
|        |                    | Nonmetro      | American Indian, Non-Hispanic | 52                      | 14                | <10           | <10              |
|        |                    |               | Asian, Non-Hispanic           | <10                     | <10               | <10           | <10              |
|        |                    |               | Multiracial, Non-Hispanic     | 94                      | 23                | <10           | <10              |
|        |                    |               | Native Hawaiian, Non-Hispanic | <10                     | <10               | <10           | <10              |

*Note.* Metro = metropolitan, 95% CI = 95% credible interval. This table shows all of the social strata, stratum-specific sample sizes, and stratum-specific prevalence for all outcomes. The table can be interpreted from left to right, hierarchically. For example, the cell including “Men” has three nested cells for the three sexual orientations included in the study. Each sexual orientation has three nested cells for the levels of rurality. Each level of rurality includes four nested cells for race and ethnicity. Some cells had fewer than 10 individuals, and to avoid compromising de-identifiability, we do not report the actual *ns* for these cells.

**Comparison and summary of Supplemental Table 1 and Supplementary Table 2.** Per the guidelines in Astivia et al. (2019), Evans et al. (2018), and Mahendran et al. (2022), a stratum sample size is too small to be interpreted when either the total stratum sample size is < 110 or when < 10 individuals within the stratum report the outcome. Of the 54 strata shown in **Supplemental Table 1** (i.e., strata that were included in the analyses), 18.5% (*n* = 10) have a total stratum sample size < 110, 16.7% (*n* = 9) have fewer than 10 individuals with suicide ideation, 20.4% (*n* = 11) have fewer than 10 individuals with suicide plans, and 40.7% (*n* = 22) have fewer than 10 individuals with suicide attempts.

Of the 72 strata shown in **Supplemental Table 2** (i.e., strata that were not included in the analyses), 65% (*n* = 47) have a total stratum sample size < 110, 61.1% (*n* = 44) have fewer than 10 individuals with suicide ideation, 79.2% (*n* = 57) have fewer than 10 individuals with suicide plans, and 86.1% (*n* = 62) have fewer than 10 individuals with suicide attempts. Given these small stratum-specific sample sizes, we excluded individuals who were Non-Hispanic Native American, Non-Hispanic Asian, Non-Hispanic multiracial, and non-Hispanic American Indian and Alaska Native from analyses.

**eTable 3.** Size of each social strata and observed prevalence of suicide ideation, plan, and attempt including 2020 data

| Gender   | Sexual orientation | Rurality            | Race and ethnicity  | Social stratum <i>n</i> | Suicide ideation <i>n</i> (%) | Suicide plan <i>n</i> (%) | Suicide attempt <i>n</i> (%) |
|----------|--------------------|---------------------|---------------------|-------------------------|-------------------------------|---------------------------|------------------------------|
| Men      | Heterosexual       | Metro (large)       | Black, Non-Hispanic | 7191                    | 293 (4.1)                     | 91 (1.3)                  | 91 (1.3)                     |
|          |                    |                     | Hispanic            | 10096                   | 401 (4)                       | 110 (1.1)                 | 110 (1.1)                    |
|          |                    |                     | White, Non-Hispanic | 24074                   | 1222 (5.1)                    | 303 (1.3)                 | 303 (1.3)                    |
|          |                    | Metro (small)       | Black, Non-Hispanic | 3477                    | 144 (4.2)                     | 53 (1.5)                  | 53 (1.5)                     |
|          |                    |                     | Hispanic            | 5424                    | 268 (5)                       | 80 (1.5)                  | 80 (1.5)                     |
|          |                    |                     | White, Non-Hispanic | 24659                   | 1325 (5.4)                    | 371 (1.5)                 | 371 (1.5)                    |
|          |                    | Nonmetro            | Black, Non-Hispanic | 1354                    | 52 (3.9)                      | 16 (1.2)                  | 16 (1.2)                     |
|          |                    |                     | Hispanic            | 1602                    | 65 (4.1)                      | 18 (1.1)                  | 18 (1.1)                     |
|          |                    |                     | White, Non-Hispanic | 15978                   | 836 (5.2)                     | 258 (1.6)                 | 258 (1.6)                    |
|          | Gay/Lesbian        | Metro (large)       | Black, Non-Hispanic | 225                     | 25 (11.2)                     | 11 (4.9)                  | 11 (4.9)                     |
|          |                    |                     | Hispanic            | 348                     | 45 (12.9)                     | 13 (3.7)                  | 13 (3.7)                     |
|          |                    |                     | White, Non-Hispanic | 846                     | 105 (12.5)                    | 37 (4.4)                  | 37 (4.4)                     |
|          |                    | Metro (small)       | Black, Non-Hispanic | 75                      | <10                           | <10                       | <10                          |
|          |                    |                     | Hispanic            | 141                     | 22 (15.6)                     | 11 (7.8)                  | 11 (7.8)                     |
|          |                    |                     | White, Non-Hispanic | 522                     | 79 (15.2)                     | 20 (3.9)                  | 20 (3.9)                     |
|          |                    | Nonmetro            | Black, Non-Hispanic | 25                      | <10                           | <10                       | <10                          |
|          |                    |                     | Hispanic            | 40                      | <10                           | <10                       | <10                          |
|          |                    |                     | White, Non-Hispanic | 226                     | 31 (13.8)                     | 11 (4.9)                  | 11 (4.9)                     |
| Bisexual | Metro (large)      | Black, Non-Hispanic | 166                 | 31 (18.7)               | 13 (7.8)                      | 13 (7.8)                  |                              |
|          |                    | Hispanic            | 283                 | 63 (22.4)               | 23 (8.2)                      | 23 (8.2)                  |                              |
|          |                    | White, Non-Hispanic | 668                 | 136 (20.5)              | 49 (7.4)                      | 49 (7.4)                  |                              |
|          | Metro (small)      | Black, Non-Hispanic | 70                  | <10                     | <10                           | <10                       |                              |
|          |                    | Hispanic            | 149                 | 37 (25)                 | 11 (7.4)                      | 11 (7.4)                  |                              |
|          |                    | White, Non-Hispanic | 675                 | 148 (22)                | 56 (8.3)                      | 56 (8.3)                  |                              |
|          | Nonmetro           | Black, Non-Hispanic | 15                  | <10                     | <10                           | <10                       |                              |
|          |                    | Hispanic            | 37                  | <10                     | <10                           | <10                       |                              |
|          |                    | White, Non-Hispanic | 346                 | 69 (20.1)               | 26 (7.6)                      | 26 (7.6)                  |                              |
| Women    | Heterosexual       | Metro (large)       | Black, Non-Hispanic | 8576                    | 362 (4.2)                     | 108 (1.3)                 | 108 (1.3)                    |
|          |                    |                     | Hispanic            | 11428                   | 506 (4.4)                     | 150 (1.3)                 | 150 (1.3)                    |
|          |                    |                     | White, Non-Hispanic | 25825                   | 1340 (5.2)                    | 343 (1.3)                 | 343 (1.3)                    |
|          |                    | Metro (small)       | Black, Non-Hispanic | 4222                    | 210 (5)                       | 56 (1.3)                  | 56 (1.3)                     |
|          |                    |                     | Hispanic            | 6019                    | 305 (5.1)                     | 99 (1.7)                  | 99 (1.7)                     |
|          |                    |                     | White, Non-Hispanic | 26664                   | 1518 (5.7)                    | 430 (1.6)                 | 430 (1.6)                    |
|          |                    | Nonmetro            | Black, Non-Hispanic | 1668                    | 71 (4.3)                      | 24 (1.4)                  | 24 (1.4)                     |
|          |                    |                     | Hispanic            | 1677                    | 98 (5.9)                      | 26 (1.6)                  | 26 (1.6)                     |
|          |                    |                     | White, Non-Hispanic | 17313                   | 992 (5.7)                     | 309 (1.8)                 | 309 (1.8)                    |
|          | Gay/Lesbian        | Metro (large)       | Black, Non-Hispanic | 290                     | 29 (10.1)                     | <10                       | <10                          |
|          |                    |                     | Hispanic            | 272                     | 40 (14.8)                     | 15 (5.6)                  | 15 (5.6)                     |
|          |                    |                     | White, Non-Hispanic | 596                     | 92 (15.5)                     | 30 (5.1)                  | 30 (5.1)                     |
|          |                    | Metro (small)       | Black, Non-Hispanic | 125                     | 12 (9.7)                      | <10                       | 4 (3.2)                      |
|          |                    |                     | Hispanic            | 132                     | 27 (20.6)                     | 12 (9.2)                  | 12 (9.2)                     |
|          |                    |                     | White, Non-Hispanic | 597                     | 96 (16.1)                     | 40 (6.7)                  | 40 (6.7)                     |
|          |                    | Nonmetro            | Black, Non-Hispanic | 29                      | <10                           | <10                       | <10                          |
|          |                    |                     | Hispanic            | 35                      | <10                           | <10                       | <10                          |
|          |                    |                     | White, Non-Hispanic | 274                     | 60 (21.9)                     | 24 (8.8)                  | 24 (8.8)                     |
| Bisexual | Metro (large)      | Black, Non-Hispanic | 781                 | 136 (17.7)              | 62 (8.1)                      | 62 (8.1)                  |                              |
|          |                    | Hispanic            | 855                 | 175 (20.6)              | 67 (7.9)                      | 67 (7.9)                  |                              |
|          |                    | White, Non-Hispanic | 2142                | 483 (22.7)              | 180 (8.5)                     | 180 (8.5)                 |                              |
|          | Metro (small)      | Black, Non-Hispanic | 344                 | 61 (17.8)               | 24 (7)                        | 24 (7)                    |                              |
|          |                    | Hispanic            | 525                 | 119 (22.7)              | 51 (9.7)                      | 51 (9.7)                  |                              |
|          |                    | White, Non-Hispanic | 2302                | 569 (24.9)              | 220 (9.6)                     | 220 (9.6)                 |                              |
|          | Nonmetro           | Black, Non-Hispanic | 91                  | 20 (22)                 | 13 (14.3)                     | 13 (14.3)                 |                              |
|          |                    | Hispanic            | 154                 | 43 (28.1)               | 18 (11.8)                     | 18 (11.8)                 |                              |
|          |                    | White, Non-Hispanic | 1244                | 306 (24.8)              | 125 (10.1)                    | 125 (10.1)                |                              |



*Note.* Metro = metropolitan, 95% CI = 95% credible interval. This table shows all of the social strata, stratum-specific sample sizes, and stratum-specific observed prevalence for all outcomes. The table can be interpreted from left to right, hierarchically. For example, the cell including “Men” has three nested cells for the three sexual orientations included in the study. Each sexual orientation has three nested cells for the levels of rurality. Each level of rurality includes three nested cells for race and ethnicity. To maintain de-identifiability, we do not report the *n* or % for cells that included fewer than 10 people reporting suicide ideation, plans, or attempts.

**eTable 4.** Predicted prevalence of suicide ideation, plan, and attempt including 2020 data

| Gender   | Sexual orientation | Rurality            | Race and ethnicity  | Suicide ideation              | Suicide plan                  | Suicide attempt               |
|----------|--------------------|---------------------|---------------------|-------------------------------|-------------------------------|-------------------------------|
|          |                    |                     |                     | Predicted prevalence (95% CI) | Predicted prevalence (95% CI) | Predicted prevalence (95% CI) |
| Men      | Heterosexual       | Metro (large)       | Black, Non-Hispanic | 3.3 (2.9, 3.6)                | 1 (0.8, 1.1)                  | 0.5 (0.4, 0.7)                |
|          |                    |                     | Hispanic            | 3 (2.7, 3.4)                  | 0.8 (0.7, 0.9)                | 0.4 (0.3, 0.6)                |
|          |                    |                     | White, Non-Hispanic | 4.6 (4.3, 4.8)                | 1.1 (1, 1.3)                  | 0.4 (0.3, 0.5)                |
|          |                    | Metro (small)       | Black, Non-Hispanic | 3.3 (2.8, 3.8)                | 1.2 (0.9, 1.5)                | 0.7 (0.5, 1)                  |
|          |                    |                     | Hispanic            | 3.7 (3.2, 4.1)                | 1.1 (0.8, 1.3)                | 0.5 (0.4, 0.6)                |
|          |                    |                     | White, Non-Hispanic | 4.7 (4.5, 5)                  | 1.3 (1.2, 1.4)                | 0.5 (0.4, 0.6)                |
|          |                    | Nonmetro            | Black, Non-Hispanic | 3.1 (2.3, 3.9)                | 1 (0.6, 1.4)                  | 0.6 (0.2, 0.9)                |
|          |                    |                     | Hispanic            | 3.1 (2.5, 3.8)                | 0.9 (0.5, 1.2)                | 0.6 (0.4, 0.9)                |
|          |                    |                     | White, Non-Hispanic | 4.6 (4.3, 4.9)                | 1.4 (1.2, 1.6)                | 0.5 (0.4, 0.6)                |
|          | Gay/Lesbian        | Metro (large)       | Black, Non-Hispanic | 8.4 (5.9, 11.4)               | 3.4 (1.9, 5.3)                | 1.8 (0.8, 3.3)                |
|          |                    |                     | Hispanic            | 9.4 (7.2, 11.5)               | 2.6 (1.2, 4)                  | 1.6 (0.7, 2.4)                |
|          |                    |                     | White, Non-Hispanic | 10.7 (8.9, 12.6)              | 3.7 (2.6, 4.5)                | 1.3 (0.7, 1.9)                |
|          |                    | Metro (small)       | Black, Non-Hispanic | 7.1 (3.2, 10.8)               | 2 (0.7, 4.8)                  | 1.4 (0.4, 3.3)                |
|          |                    |                     | Hispanic            | 10.7 (7.5, 15.6)              | 4.7 (2.1, 7.1)                | 1.3 (0.4, 2.3)                |
|          |                    |                     | White, Non-Hispanic | 11.7 (8.9, 13.6)              | 2.8 (1.8, 4)                  | 1.4 (0.7, 2.5)                |
|          |                    | Nonmetro            | Black, Non-Hispanic | 7.3 (2.8, 14.8)               | 1.9 (0.2, 4.5)                | 1 (0.2, 2.8)                  |
|          |                    |                     | Hispanic            | 10.9 (4.5, 17.8)              | 4.6 (1.1, 8.2)                | 1.7 (0.4, 3.9)                |
|          |                    |                     | White, Non-Hispanic | 10.7 (7.7, 13.9)              | 3.3 (1.3, 5.4)                | 3.1 (1.5, 5.1)                |
| Bisexual | Metro (large)      | Black, Non-Hispanic | 13.1 (8.5, 17.9)    | 4.8 (2.7, 7.1)                | 2.1 (1, 3.5)                  |                               |
|          |                    | Hispanic            | 14.8 (11.7, 18.4)   | 5 (3.3, 7)                    | 1.8 (1, 3.1)                  |                               |
|          |                    | White, Non-Hispanic | 14.5 (12.5, 17)     | 4.8 (3.3, 6.3)                | 1.7 (0.9, 2.4)                |                               |
|          | Metro (small)      | Black, Non-Hispanic | 6.7 (2.5, 11.1)     | 3.5 (0.9, 6.5)                | 2.4 (0.7, 5)                  |                               |
|          |                    | Hispanic            | 15.6 (12.2, 20.7)   | 4.2 (2.1, 7.4)                | 2 (0.8, 3.7)                  |                               |
|          |                    | White, Non-Hispanic | 15.4 (12.9, 17.5)   | 5.3 (4, 6.7)                  | 1.5 (1, 2.3)                  |                               |
|          | Nonmetro           | Black, Non-Hispanic | 13.1 (4, 24.6)      | 4.3 (1.1, 10.3)               | 1.7 (0.2, 4.6)                |                               |
|          |                    | Hispanic            | 13.7 (5.2, 22.3)    | 7 (2.4, 13.5)                 | 2.4 (0.5, 5.5)                |                               |
|          |                    | White, Non-Hispanic | 13.5 (11.2, 16.4)   | 4.6 (3.2, 6.7)                | 1.5 (0.8, 2.5)                |                               |
| Women    | Heterosexual       | Metro (large)       | Black, Non-Hispanic | 3.6 (3.3, 4)                  | 1.1 (0.9, 1.3)                | 0.6 (0.5, 0.7)                |
|          |                    |                     | Hispanic            | 3.5 (3.2, 3.8)                | 1 (0.8, 1.2)                  | 0.5 (0.4, 0.6)                |
|          |                    |                     | White, Non-Hispanic | 4.8 (4.6, 5.1)                | 1.2 (1.1, 1.3)                | 0.5 (0.4, 0.6)                |
|          |                    | Metro (small)       | Black, Non-Hispanic | 4.1 (3.6, 4.6)                | 1.1 (0.8, 1.4)                | 0.7 (0.5, 0.9)                |
|          |                    |                     | Hispanic            | 3.9 (3.6, 4.5)                | 1.2 (1, 1.5)                  | 0.6 (0.5, 0.8)                |
|          |                    |                     | White, Non-Hispanic | 5.1 (4.9, 5.4)                | 1.4 (1.3, 1.5)                | 0.6 (0.5, 0.7)                |
|          |                    | Nonmetro            | Black, Non-Hispanic | 3.6 (2.9, 4.4)                | 1.2 (0.8, 1.6)                | 0.8 (0.5, 1.2)                |
|          |                    |                     | Hispanic            | 4.5 (3.6, 5.2)                | 1.2 (0.8, 1.6)                | 0.6 (0.3, 0.9)                |
|          |                    |                     | White, Non-Hispanic | 5.3 (4.9, 5.5)                | 1.6 (1.4, 1.8)                | 0.6 (0.5, 0.7)                |
|          | Gay/Lesbian        | Metro (large)       | Black, Non-Hispanic | 7 (5.2, 9.5)                  | 2.1 (1.1, 3.4)                | 1.5 (0.7, 2.7)                |
|          |                    |                     | Hispanic            | 10.5 (7.3, 13.5)              | 3.5 (2.1, 5.2)                | 1.6 (0.7, 2.9)                |
|          |                    |                     | White, Non-Hispanic | 12.5 (10.1, 14.8)             | 3.9 (2.9, 5.3)                | 1.5 (0.8, 2.4)                |
|          |                    | Metro (small)       | Black, Non-Hispanic | 6.7 (4.1, 9.9)                | 2.1 (0.8, 4)                  | 1.6 (0.6, 3)                  |
|          |                    |                     | Hispanic            | 13.6 (9, 18.2)                | 5.1 (2.4, 8.1)                | 2.9 (1.4, 5.1)                |
|          |                    |                     | White, Non-Hispanic | 13 (10.5, 15)                 | 5.1 (3.6, 6.6)                | 1.9 (1.1, 3.1)                |
|          |                    | Nonmetro            | Black, Non-Hispanic | 6.1 (2.2, 13.5)               | 3.8 (1.2, 8.5)                | 1.3 (0.3, 3.8)                |
|          |                    |                     | Hispanic            | 12.4 (5.4, 20.7)              | 3 (0.5, 6.8)                  | 0.9 (0.3, 2.2)                |
|          |                    |                     | White, Non-Hispanic | 16.5 (13.1, 20.3)             | 6.2 (4.2, 8.8)                | 2.6 (1.3, 4)                  |
| Bisexual | Metro (large)      | Black, Non-Hispanic | 11.5 (9.5, 13.2)    | 4.9 (3.6, 6.1)                | 2.6 (1.9, 3.5)                |                               |
|          |                    | Hispanic            | 13.1 (11.6, 14.9)   | 4.6 (3.4, 5.5)                | 2.1 (1.4, 2.8)                |                               |
|          |                    | White, Non-Hispanic | 15.7 (14.5, 16.8)   | 5.4 (4.7, 6.1)                | 2.2 (1.8, 2.7)                |                               |
|          | Metro (small)      | Black, Non-Hispanic | 11.4 (8.5, 14.2)    | 4.1 (2.8, 5.6)                | 1.5 (0.7, 2.3)                |                               |
|          |                    | Hispanic            | 14.3 (12.2, 16.5)   | 5.6 (4.4, 7.3)                | 2.6 (1.8, 3.5)                |                               |
|          |                    | White, Non-Hispanic | 16.8 (15.5, 18)     | 5.9 (5.3, 6.8)                | 2.3 (1.8, 2.7)                |                               |
|          | Nonmetro           | Black, Non-Hispanic | 13.1 (7.8, 18.4)    | 7.1 (4.2, 11.2)               | 3.2 (1.4, 6)                  |                               |
|          |                    | Hispanic            | 17.2 (12.8, 21.4)   | 6.1 (3.7, 9)                  | 2.7 (1, 4.6)                  |                               |
|          |                    | White, Non-Hispanic | 16.5 (14.6, 18)     | 6.1 (5, 7.1)                  | 2.5 (1.9, 3.2)                |                               |

*Note.* Metro = metropolitan, 95% CI = 95% credible interval. Estimates are adjusted for age category and survey year. This table shows all of the social strata, stratum-specific sample sizes, and stratum-specific predicted prevalence for all outcomes. The table can be interpreted from left to right, hierarchically. For example, the cell including “Men” has three nested cells for the three sexual orientations included in the study. Each sexual orientation has three nested cells for the levels of rurality. Each level of rurality includes three nested cells for race and ethnicity.

### eAppendix 3. Code used for analyses

```
library(haven) #v2.4.3
library(foreign) #v0.8-81
library(dplyr) #v1.0.7
library(tidyr) #v1.1.4
library(data.table) #v1.14.2
library(brms) #v2.17.0
library(emmeans) #v1.7.3
library(broom.mixed) #v0.2.9.4
library(stringr) #v1.4.0
library(ggplot2) #v3.3.5
library(readxl) #v1.3.1

#install.packages("remotes")
#remotes::install_github("stan-dev/cmdstanr")
install.packages("cmdstanr", repos = c("https://mc-stan.org/r-packages/", getOption("repos")))

library(cmdstanr)
#install_cmdstan(cores = 2)

#----0. data cleaning code available upon request----
#----1. ideation ----
model_ideation_4 <- brm(ideation ~ age + year + (1 | strata_Inf2),
  data = data1, family = bernoulli(link = "logit"),
  seed = 123, # set seed to get reproducible results
  chains = 2, cores = 2, threads = threading(2), # running 2 chains in parallel
  backend = "cmdstanr", # enables parallelization
  iter = 10000, # 50,000 total iterations // adjust as-needed
  warmup = 5000, # 5,000 warm-up iterations // adjust as-needed
  thin = 50, # thinning every 50 iterations // adjust as-needed
  file = "model_ideation_4") # save model object as an Rds file within current
working directory
#refresh = 0, # hides model fit progress (can omit this)
#control = list(adapt_delta = 0.95))
summary(model_ideation_4)

table(data1$strata_Inf2, data1$ideation)

# calculating VPC:
random_effects_ideation_4 <- tidy(model_ideation_4, effects = "ran_pars")
random_effects_ideation_4[1,5]^2
vpc_ideation_4 <- ((random_effects_ideation_4[1,5]^2)/((random_effects_ideation_4[1,5]^2) +
3.29))*100
```

vpc\_ideation\_4

# obtaining predicted probabilities for each strata:

```
model_ideation_4 %>%  
  emmeans(~ strata_Inf2,  
    epred = TRUE,  
    re_formula = NULL,  
    type = "response")
```

#-----2. plan -----

```
model_plan_4 <- brm(plan ~ age + year + (1 | strata_Inf2),  
  data = data1, family = bernoulli(link = "logit"),  
  seed = 123, # set seed to get reproducible results  
  chains = 2, cores = 2, threads = threading(2), # running 2 chains in parallel  
  backend = "cmdstanr", # enables parallelization  
  iter = 10000, # 50,000 total iterations // adjust as-needed  
  warmup = 5000, # 5,000 warm-up iterations // adjust as-needed  
  thin = 50, # thinning every 50 iterations // adjust as-needed  
  file = "model_plan_4") # save model object as an Rds file within current working  
directory
```

```
summary(model_plan_4)
```

# calculating VPC:

```
random_effects_plan_4 <- tidy(model_plan_4, effects = "ran_pars")  
vpc_plan <- ((random_effects_plan_4[1,5]^2)/((random_effects_plan_4[1,5]^2) + 3.29))*100  
vpc_plan
```

# obtaining predicted probabilities for each strata:

```
model_plan_4 %>%  
  emmeans(~ strata_Inf2,  
    epred = TRUE,  
    re_formula = NULL,  
    type = "response")
```

#-----3. attempt-----

```
model_attempt_4 <- brm(attempt ~ age + year + (1 | strata_Inf2),  
  data = data1, family = bernoulli(link = "logit"),  
  seed = 123, # set seed to get reproducible results  
  chains = 2, cores = 2, threads = threading(2), # running 2 chains in parallel  
  backend = "cmdstanr", # enables parallelization  
  iter = 10000, # 50,000 total iterations // adjust as-needed  
  warmup = 5000, # 5,000 warm-up iterations // adjust as-needed  
  thin = 50, # thinning every 50 iterations // adjust as-needed
```

```

file = "model_attempt_4") # save model object as an Rds file within current
working directory
summary(model_attempt_4)

# calculating VPC:
random_effects_attempt_4 <- tidy(model_attempt_4, effects = "ran_pars")
vpc_attempt_4 <- ((random_effects_attempt_4[1,5]^2)/((random_effects_attempt_4[1,5]^2) +
3.29))*100
vpc_attempt_4

# obtaining predicted probabilities for each strata:
model_attempt_4 %>%
  emmeans(~ strata_Inf2,
    epred = TRUE,
    re_formula = NULL,
    type = "response")

#----- 4. figures -----

pred_prev_ideation_r1.3 <- read_excel("~/Dropbox/Penn State/Papers/NSDUH/NSDUH/pred
prev_ideation.xlsx", sheet = "R1 no combined, no 2020")
p_id_r1.3 <- ggplot(pred_prev_ideation_r1.3, aes(x = label4, y = emmean2, color = sex_orient))
+
  geom_point(aes(shape = race, fill = sex_orient), size = 2.5)+
  geom_errorbar(aes(ymin=lower.HPD2, ymax=upper.HPD2, color = sex_orient), width = .3,
position = "dodge") +
  ggtitle("Suicide ideation") +
  ylab("Predicted prevalence")+
  scale_y_continuous(breaks = c(5, 10, 15, 20, 25))+
  scale_shape_manual(breaks = c("Non-Hispanic White", "Non-Hispanic Black", "Hispanic"),
    values = c(22, 24, 21))+
  scale_color_manual(values = c("#1b9e77", "#d95f02", "#7570b3"), guide =
guide_legend(reverse = TRUE))+
  scale_fill_manual(values = c("#1b9e77", "#d95f02", "#7570b3"))+
  theme_bw() +
  facet_wrap(county~sex, scales = "free_y", ncol = 2, strip.position = "left") +
  coord_flip() +
  theme(axis.title.y = element_blank()) +
  labs(color = "Sexual Orientation", shape = "Race")+
  guides(shape = guide_legend(order = 1),
    color = guide_legend(reverse = TRUE, order = 2),
    fill = "none")
pdf("plot_ideation_r1.3.pdf", w = 12)
print(p_id_r1.3)
dev.off()

```

```

pred_prev_plan_r1.3 <- read_excel("~/Dropbox/Penn State/Papers/NSDUH/NSDUH/pred
prev_plan.xlsx", sheet = "R1 no combined, no 2020")
p_plan_r1.3 <- ggplot(pred_prev_plan_r1.3, aes(x = label4, y = emmean2, color = sex_orient)) +
  geom_point(aes(shape = race, fill = sex_orient), size = 2.5)+
  geom_errorbar(aes(ymin=lower.HPD2, ymax=upper.HPD2, color = sex_orient), width = .3,
position = "dodge") +
  ggtitle("Suicide plan") +
  ylab("Predicted prevalence")+
  scale_y_continuous(breaks = c(2.5, 5, 7.5, 10, 12.5))+
  scale_shape_manual(breaks = c("Non-Hispanic White", "Non-Hispanic Black", "Hispanic"),
  values = c(22, 24, 21))+
  scale_color_manual(values = c("#1b9e77", "#d95f02", "#7570b3"), guide =
guide_legend(reverse = TRUE))+
  scale_fill_manual(values = c("#1b9e77", "#d95f02", "#7570b3"))+
  theme_bw() +
  facet_wrap(county~sex, scales = "free_y", ncol = 2, strip.position = "left") +
  coord_flip() +
  theme(axis.title.y = element_blank()) +
  labs(color = "Sexual Orientation", shape = "Race")+
  guides(shape = guide_legend(order = 1),
  color = guide_legend(reverse = TRUE, order = 2),
  fill = "none")
pdf("plot_plan_r1.3.pdf", w = 12)
print(p_plan_r1.3)
dev.off()

```

```

pred_prev_attempt_r1.3 <- read_excel("~/Dropbox/Penn State/Papers/NSDUH/NSDUH/pred
prev_attempt.xlsx", sheet = "R1 no combined, no 2020")
p_attempt_r1.3 <- ggplot(pred_prev_attempt_r1.3, aes(x = label4, y = emmean2, color =
sex_orient)) +
  geom_point(aes(shape = race, fill = sex_orient), size = 2.5)+
  geom_errorbar(aes(ymin=lower.HPD2, ymax=upper.HPD2, color = sex_orient), width = .3,
position = "dodge") +
  ggtitle("Suicide attempt") +
  ylab("Predicted prevalence")+
  scale_y_continuous(breaks = c(0, 3, 6, 9, 12))+
  scale_shape_manual(breaks = c("Non-Hispanic White", "Non-Hispanic Black", "Hispanic"),
  values = c(22, 24, 21))+
  scale_color_manual(values = c("#1b9e77", "#d95f02", "#7570b3"), guide =
guide_legend(reverse = TRUE))+
  scale_fill_manual(values = c("#1b9e77", "#d95f02", "#7570b3"))+
  theme_bw() +
  facet_wrap(county~sex, scales = "free_y", ncol = 2, strip.position = "left") +
  coord_flip() +
  theme(axis.title.y = element_blank()) +
  labs(color = "Sexual Orientation", shape = "Race")+

```

```
guides(shape = guide_legend(order = 1),
       color = guide_legend(reverse = TRUE, order = 2),
       fill = "none")
pdf("plot_attmept_r1.3.pdf", w = 12)
print(p_attempt_r1.3)
dev.off()
```



## **eReferences**

Astivia, O. L. O., Gadermann, A., & Guhn, M. (2019). The relationship between statistical power and predictor distribution in multilevel logistic regression: A simulation-based approach. *BMC Medical Research Methodology*, *19*:97.

Evans CR, Williams DR, Onnela JP, Subramanian SV. A multilevel approach to modeling health inequalities at the intersection of multiple social identities. *Soc Sci Med*. 2018;203:64-73. doi:10.1016/j.socscimed.2017.11.011

Mahendran, M., Lizotte, D., & Bauer, G. R. (2022). Quantitative methods for descriptive intersectional analysis with binary health outcomes. *SSM Population Health*, *17*:101032.
