# Supplementary material
Source: PubMed Central journal article supplement (PMC10357364)
Supplement: jamapsychiatry-e232295-s002.pdf [file jamapsychiatry-e232295-s002.pdf]

## Data Sharing Statement

Forrest. Intersectional Prevalence of Suicide Ideation, Plan, and Attempt Based on Gender, Sexual Orientation, Race and Ethnicity, and Rurality. *JAMA Psychiatry*. Published July 19, 2023. doi:10.1001/jamapsychiatry.2023.2295

### Data

**Data available:** No

### Additional Information

**Explanation for why data not available:** No data were collected for the current study. All data are publicly available through the Substance Abuse & Mental Health Data Archive (SAMHDA):

<https://www.datafiles.samhsa.gov/dataset/national-survey-drug-use-and-health-2020-nsduh-2020-ds0001>
